# Supplementary material for: The VEINES-QOL/Sym questionnaire is a reliable and valid disease-specific quality of life measure for deep vein thrombosis in elderly patients
Source: Springer Nature journal article supplement (doi:10.1007/s11136-014-0704-x), 2014-05-03
Supplement: MOESM1 [file 281766]

# APPENDIX

# Completeness and floor and ceiling effects of summary scores

|  | **French questionnaire** | | **German questionnaire** | |
| --- | --- | --- | --- | --- |
| **Score** | **QoL score** | **Sym score** | **QoL score** | **Sym score** |
|  | N (%) | N (%) | N (%) | N (%) |
| Total N | 107 | 107 | 245 | 245 |
| Scorable (≥50% of items complete) | 107 (100) | 103 (96.3) | 245 (100.0) | 245 (100.0) |
| Total N | 107 | 103 | 245 | 245 |
| Floor effects* | 0 (0.0) | 0 (0.0) | 0 (0.0) | 0 (0.0) |
| Ceiling effects* | 0 (0.0) | 8 (7.8) | 1 (0.4) | 30 (12.2) |

*Proportion of patients achieving lowest or highest possible score

# Internal consistency

|  | **French questionnaire** | | **German questionnaire** | |
| --- | --- | --- | --- | --- |
| **Score** | **QoL score** | **Sym score** | **QoL score** | **Sym score** |
| Number of items | 25 | 10 | 25 | 10 |
| Cronbach's alpha | 0.93 | 0.88 | 0.92 | 0.82 |
| Average inter-item correlation | 0.34 | 0.43 | 0.31 | 0.32 |
| Item-total correlation  1a | 0.65 | 0.76 | 0.63 | 0.66 |
| 1b | 0.68 | 0.75 | 0.71 | 0.74 |
| 1c | 0.51 | 0.58 | 0.42 | 0.51 |
| 1d | 0.49 | 0.63 | 0.39 | 0.61 |
| 1e | 0.64 | 0.78 | 0.49 | 0.61 |
| 1f | 0.51 | 0.64 | 0.45 | 0.65 |
| 1g | 0.69 | 0.79 | 0.41 | 0.55 |
| 1h | 0.63 | 0.68 | 0.39 | 0.51 |
| 1i | 0.65 | 0.72 | 0.51 | 0.65 |
| 3 | 0.18 | - | -0.10 | - |
| 4a | 0.62 | - | 0.80 | - |
| 4b | 0.68 | - | 0.76 | - |
| 4c | 0.70 | - | 0.77 | - |
| 4d | 0.72 | - | 0.69 | - |
| 5a | 0.72 | - | 0.72 | - |
| 5b | 0.68 | - | 0.69 | - |
| 5c | 0.73 | - | 0.72 | - |
| 5d | 0.70 | - | 0.72 | - |
| 6 | 0.62 | - | 0.79 | - |
| 7 | 0.71 | 0.69 | 0.78 | 0.71 |
| 8a | 0.53 | - | 0.63 | - |
| 8b | 0.63 | - | 0.68 | - |
| 8c | 0.58 | - | 0.60 | - |
| 8d | 0.52 | - | 0.58 | - |
| 8e | 0.42 | - | 0.35 | - |
